# Supplementary material for: Modulation of Pathways Underlying Distinct Cell Death Mechanisms in Two Human Lung Cancer Cell Lines in Response to SN1 Methylating Agents Treatment
Source: PLoS One. 2016 Jul 28;11(7):e0160248. doi: 10.1371/journal.pone.0160248 (PMC4965087; doi:10.1371/journal.pone.0160248)
Supplement: S8 Table — (XLSX) [file pone.0160248.s008.xlsx]

## Sheet: Table S7
GO-Analysis performed by StRAnGER, using as input the under-expressed genes after MNU-treatment of H157 cells.
Annotation	Enrichment	Bootstrap-corrected p-value
cholesterol biosynthetic process	6/21	4e-06
cell cycle	13/352	1.8e-05
regulation of cyclin-dependent protein kinase activity	6/35	2.1e-05
response to virus	7/75	3.1e-05
isoprenoid biosynthetic process	4/13	3.5e-05
cell division	8/191	4.8e-05
interspecies interaction between organisms	7/202	6.7e-05
translational elongation	5/91	7.1e-05
positive regulation of cell proliferation	6/170	8.1e-05
organ morphogenesis	5/116	8.4e-05
oxidation reduction	9/462	0.000103
inflammatory response	6/214	0.000106
cell cycle arrest	4/88	0.000109
cell adhesion	9/493	0.000116
lipid metabolic process	6/250	0.000135
chemotaxis	4/118	0.00017
DNA replication	4/119	0.000177
